# Supplementary figures and images for: Association of Serum Levels of Plasticizers Compounds, Phthalates and Bisphenols, in Patients and Survivors of Breast Cancer: A Real Connection?
Source: MDPI journal article supplement (doi:10.3390/ijerph19138040), 2022-06-30

**Figure S1: Flow chart of participants recruitment**

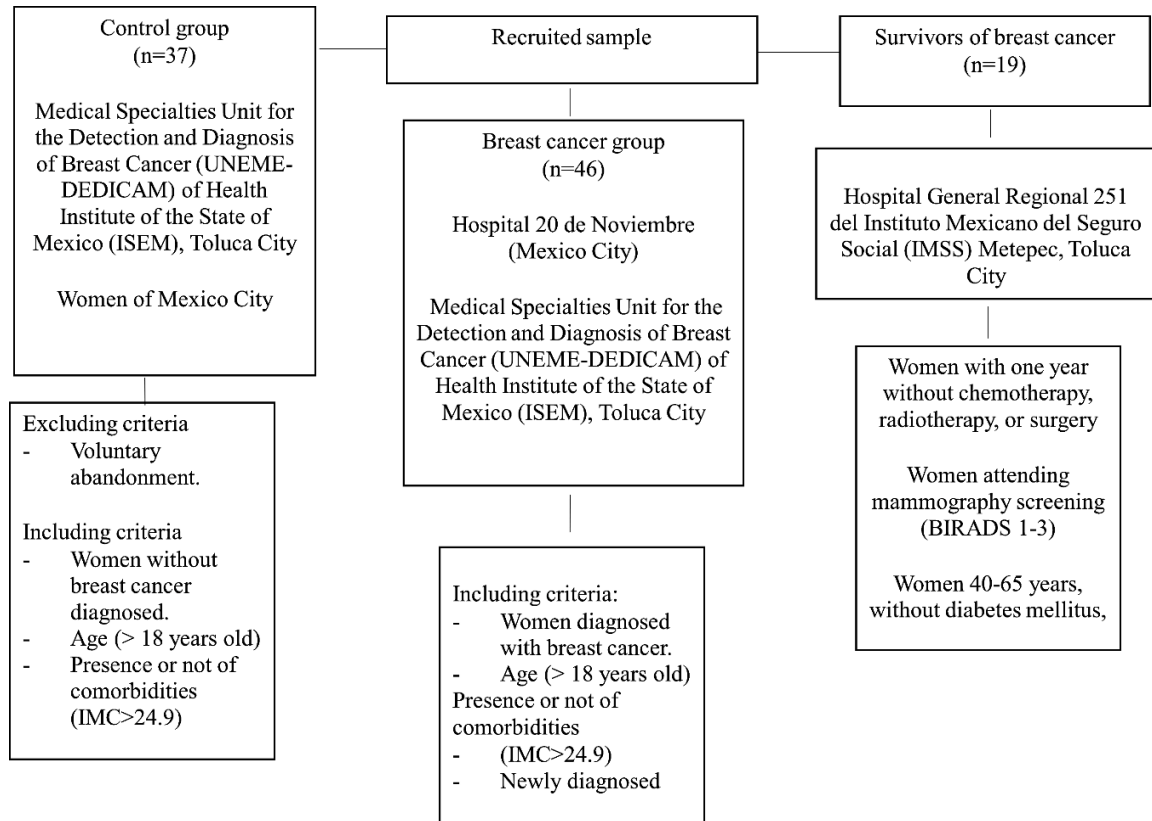

Supplement: s1 [file s1]
